# Supplementary material
Source: PubMed Central journal article supplement (PMC2287363)
Supplement: plntphys_pp.107.113282_3.pdf [file plntphys_pp.107.113282_3.pdf]

Figure S1. *IRT1*promoter-*IRT1*K146R,K171R and *IRT1*promoter-*IRT1*4HQ constructs complement *irt1-1*. Plants were grown under normal conditions in soil without added iron, except where indicated. Iron supplementation of *irt1-1* was performed twice weekly by watering with 0.5 g/L Sequestrene. Shown left to right are WT (*Col gl-1*), *irt1-1*, *irt1-1* +Fe, *IRT1* promoter-*IRT1*intact/*irt1-1*, *IRT1*promoter-*IRT1*K146R,K171R/*irt1* (labeled IRT1DK/*irt1*) and *IRT1* promoter-*IRT1*4HQ/*irt1-1*.

Figure S2. Mutation of the IRT1 histidine motif does not affect iron-induced IRT1 protein turnover. Plants were grown on B5 medium for 10 days, transferred to -Fe plates for 3 days and subsequently transferred again to +Fe plates. Roots were harvested at 0, 12, 18, 24, 36, 48 and 72 after the transfer to +Fe. RNA and protein samples were prepared and used to perform northern and western analysis.
