# Supplementary material
Source: PubMed Central journal article supplement (PMC2287363)

Supplemental Figure 1

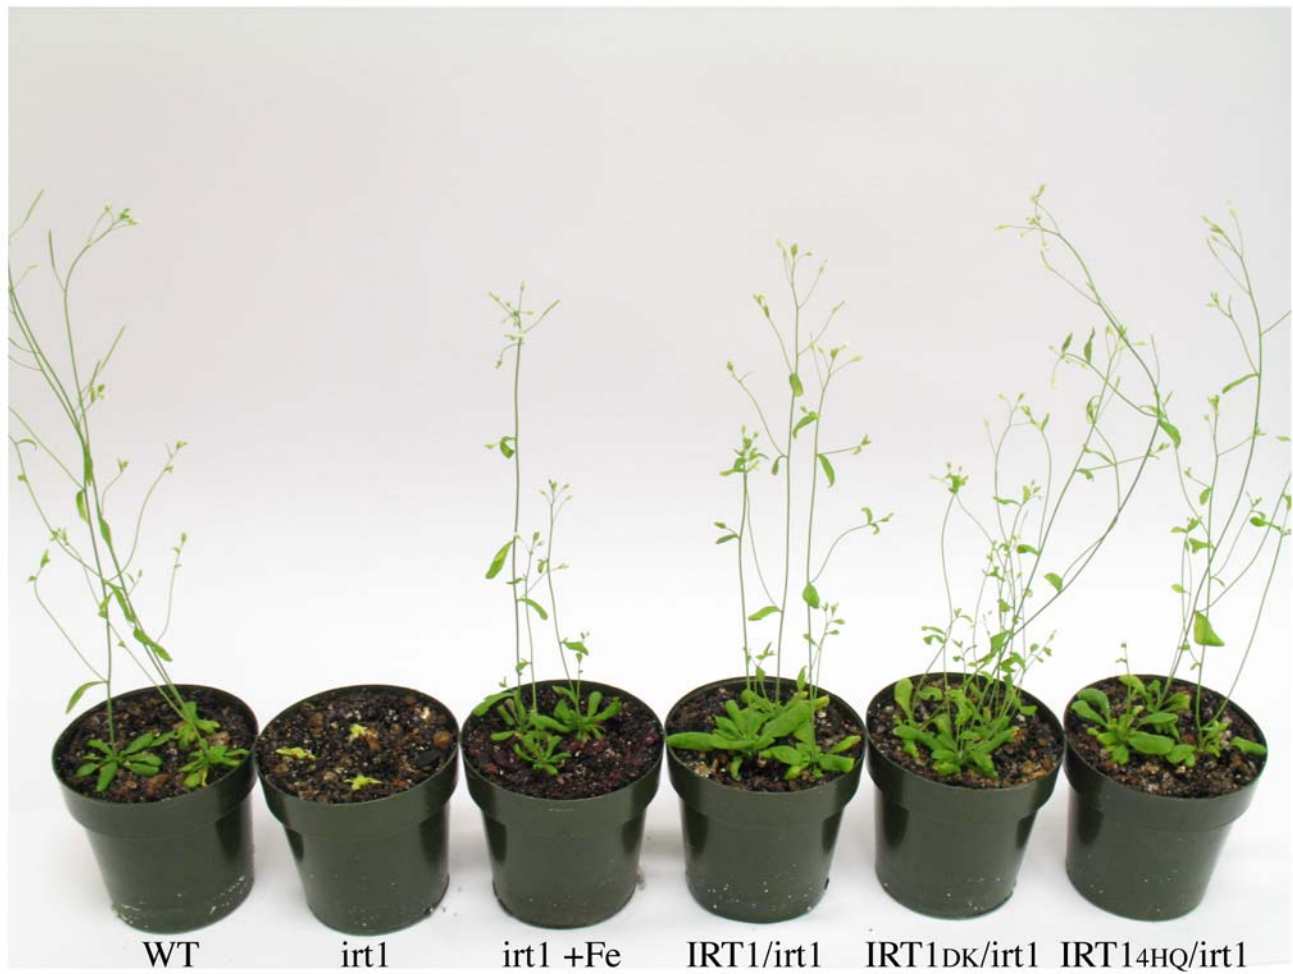

Supplement: plntphys_pp.107.113282_1.pdf [file plntphys_pp.107.113282_1.pdf]

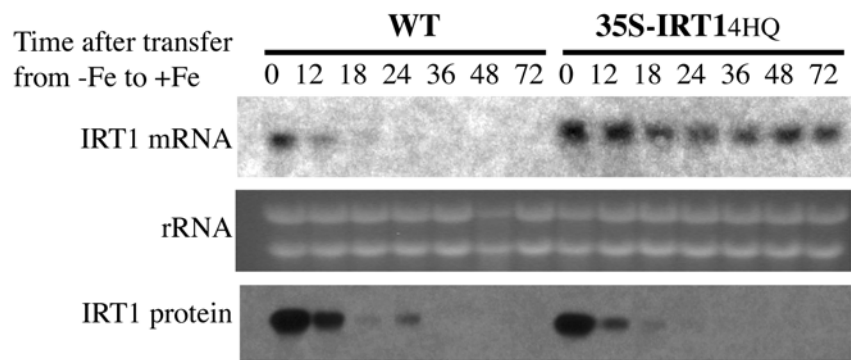

Supplement: plntphys_pp.107.113282_2.pdf [file plntphys_pp.107.113282_2.pdf]
